# Supplementary material for: Role of Tobramycin in the Induction and Maintenance of Viable but Non-Culturable Pseudomonas aeruginosa in an In Vitro Biofilm Model
Source: MDPI journal article supplement (doi:10.3390/antibiotics9070399), 2020-07-10
Supplement: s1 [file s1]

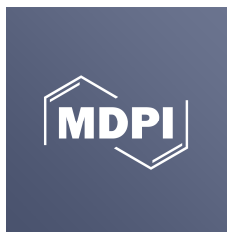

## Disclosure of Potential Conflicts of Interest

All authors must disclose all relationships or interests that could inappropriately influence or bias their work. Although the presence of a relationship or activity does not always indicate a problematic influence on a paper's content, perceptions of conflict can erode trust in science as much as actual conflicts of interest. Ultimately, readers must be able to make their own judgments regarding whether an author's relationships and activities are pertinent to a paper's content. These judgments require transparent disclosures. An author's complete disclosure demonstrates a commitment to transparency and helps to maintain trust in the scientific process.

The corresponding author collects the conflict of interest disclosure from all authors. The corresponding author must include a summary statement in the manuscript in a separate section "Conflicts of Interest" placed just before the reference list. The statement should reflect all the collected potential conflict of interest disclosures in the form.

|                           |  |
|---------------------------|--|
| Journal Name:             |  |
| Manuscript ID (if known): |  |
| Manuscript Title:         |  |
| Authors:                  |  |
| Corresponding Author(s):  |  |

### Financial interests

These may include but are not limited to membership, employment, consultancies, stocks/shares ownership; honoraria; grants or other funding; paid expert testimony and patent-licensing arrangements. Some examples are as follows:

- An author has received or expects to receive research grants from funding agencies (please provide details regarding the research funder and the grant number)
- An author has received support from commercial sources of funding by companies that sell drugs, medical devices, or provide medical services
- An author has received honoraria for speaking at symposia
- An author holds a position on advisory boards
- An author is an inventor of any planned, pending, or awarded patent on this work (please provide detailed information such as regarding the patent applicant, name of inventors, application number, status of application, specific aspects of manuscripts covered in the patent application)
- An author is an employee of an organization or company

### Non-financial interests

These may include but are not limited to personal relationships or competing interests directly or indirectly tied to this research, or professional interests or personal beliefs that may influence your research.

*The authors whose names are listed immediately below certify that they have NO conflicts of interest to declare:*

*The authors whose names are listed immediately below report the following conflicts of interest related to the work under consideration:*

**This statement is signed by all the authors to indicate agreement that the above information is true and correct** (a photocopy of this form may be used if there are more than 10 authors):

| Author's name (typed) | Author's signature                                                                  | Date |
|-----------------------|-------------------------------------------------------------------------------------|------|
|                       |  |      |
|                       |  |      |
|                       |  |      |
|                       |  |      |
|                       |  |      |
|                       |  |      |
|                       |  |      |
|                       |  |      |
|                       |  |      |
|                       |  |      |
